# Supplementary material for: Genetic parameters for uniformity of harvest weight and body size traits in the GIFT strain of Nile tilapia
Source: PubMed Central journal article supplement (PMC4901462; doi:10.1186/s12711-016-0218-9), 2016-06-10
Supplement: 12711_2016_218_MOESM1_ESM.pdf [file 12711_2016_218_MOESM1_ESM.pdf]

## Additional file 1

Figure S1 represents example of block design used to allocate two families to each group. All families in the block are unrelated to each other.

| Family ID | 2   | 3   | 4   | 5   | 6   | 7   | 8   | 9   | 10   | 11    |
|-----------|-----|-----|-----|-----|-----|-----|-----|-----|------|-------|
| 1         | 1-2 | 1-3 | 1-4 | 1-5 | 1-6 | 1-7 | 1-8 | 1-9 | 1-10 | 1-11  |
| 2         |     | 2-3 | 2-4 | 2-5 | 2-6 | 2-7 | 2-8 | 2-9 | 2-10 | 2-11  |
| 3         |     |     | 3-4 | 3-5 | 3-6 | 3-7 | 3-8 | 3-9 | 3-10 | 3-11  |
| 4         |     |     |     | 4-5 | 4-6 | 4-7 | 4-8 | 4-9 | 4-10 | 4-11  |
| 5         |     |     |     |     | 5-6 | 5-7 | 5-8 | 5-9 | 5-10 | 5-11  |
| 6         |     |     |     |     |     | 6-7 | 6-8 | 6-9 | 6-10 | 6-11  |
| 7         |     |     |     |     |     |     | 7-8 | 7-9 | 7-10 | 7-11  |
| 8         |     |     |     |     |     |     |     | 8-9 | 8-10 | 8-11  |
| 9         |     |     |     |     |     |     |     |     | 9-10 | 9-11  |
| 10        |     |     |     |     |     |     |     |     |      | 10-11 |

**Figure S1** Example of the block design used to allocate two families to each group
