# Supplementary material for: Genetic parameters for uniformity of harvest weight and body size traits in the GIFT strain of Nile tilapia
Source: PubMed Central journal article supplement (PMC4901462; doi:10.1186/s12711-016-0218-9), 2016-06-10
Supplement: 12711_2016_218_MOESM2_ESM.pdf [file 12711_2016_218_MOESM2_ESM.pdf]

## Additional file 2

Table S1 contains genetic parameters for the mean and the variance of Box-Cox transformed harvest weight estimated using Double Hierarchical Generalized Linear Models.

**Table S1 Genetic parameters for the mean and the variance of Box-Cox transformed harvest weight**

| Parameter                 | Mean                       | Variance      |
|---------------------------|----------------------------|---------------|
| <sup>a</sup> $\sigma_A^2$ | 0.100 (0.019) <sup>b</sup> | 0.239 (0.052) |
| $\sigma_e^2$              | 0.184 (0.004)              | 1.804 (0.035) |
| $\sigma_g^2$              | 0.050 (0.007)              | 0.035 (0.019) |
| $\sigma_k^2$              | 0.032 (0.004)              | 0.048 (0.025) |
| $\sigma_m^2$              | 0.008 (0.003)              | 0.014 (0.009) |
| $\sigma_P^2$              | 0.323 (0.011)              | –             |
| $h^2$                     | 0.31 (0.05)                | –             |
| <sup>b</sup> $g^2$        | 0.15 (0.02)                | –             |
| <sup>c</sup> $k^2$        | 0.10 (0.02)                | –             |
| <sup>d</sup> $m^2$        | 0.02 (0.01)                | –             |
| <sup>e</sup> GCV          | 0.06                       | 0.49          |

Standard errors are indicated between brackets

<sup>a</sup>Additive genetic variance was calculated as 4 times the sire-dam variance

<sup>b</sup>Group effect, calculated as  $g^2 = \sigma_g^2 / \sigma_P^2$

<sup>c</sup>Kin effect, calculated as  $k^2 = \sigma_k^2 / \sigma_P^2$

<sup>d</sup>Social maternal effect, calculated as  $m^2 = \sigma_m^2 / \sigma_P^2$

<sup>e</sup>Genetic coefficient of variation
